# Supplementary material for: Relation of prior statin and anti-hypertensive use to severity of disease among patients hospitalized with COVID-19: Findings from the American Heart Association’s COVID-19 Cardiovascular Disease Registry
Source: PubMed Central journal article supplement (PMC8281996; doi:10.1371/journal.pone.0254635), 2021-07-15
Supplement: pone.0254635.s002.pdf [file pone.0254635.s002.pdf]

**S1 Table. Characteristics of patients who survived compared with those with in-hospital death/discharge to hospice**

|                                      | <b>Alive (n=8329)</b> | <b>Death (n=2212)</b> | <b>OR</b> | <b>95% CI</b> | <b>p</b> |
|--------------------------------------|-----------------------|-----------------------|-----------|---------------|----------|
| <b>Male</b>                          | 4,553 (55%)           | 1,262 (57%)           | 1.10      | 1.00,1.21     | 0.05     |
| <b>Age (years)*</b>                  | 63.8 ± 13.5           | 75.1 ± 12.9           | 1.85      | 1.78,1.92     | <0.001   |
| <b>Insurance status</b>              |                       |                       |           |               |          |
| Medicare (over age 65)               | 3,808 (46%)           | 1,754 (79%)           | 6.91      | 5.76,8.36     | <0.001   |
| Public                               | 1,790 (21%)           | 274 (12%)             | 2.30      | 1.85,2.87     | <0.001   |
| No insurance/unknown                 | 689 (8%)              | 48 (2%)               | 1.05      | 0.73,1.48     | 0.79     |
| Private                              | 2,042 (25%)           | 136 (6%)              | REF       | REF           | REF      |
| <b>Race</b>                          |                       |                       |           |               |          |
| Hispanic                             | 2,272 (27%)           | 502 (23%)             | 0.69      | 0.61,0.78     | <0.001   |
| Black                                | 2,234 (27%)           | 524 (24%)             | 0.73      | 0.65,0.83     | <0.001   |
| Other                                | 979 (12%)             | 273 (12%)             | 0.87      | 0.74,1.01     | 0.08     |
| Non-Hispanic White                   | 2,844 (34%)           | 913 (41%)             | REF       | REF           | REF      |
| <b>Medication history†</b>           |                       |                       |           |               |          |
| Statin                               | 888 (11%)             | 369 (17%)             | 1.24      | 1.13,1.37     | <0.001   |
| ACE inhibitor                        | 1,461 (18%)           | 370 (17%)             | 0.94      | 0.83,1.07     | 0.38     |
| ARB                                  | 1,150 (14%)           | 326 (15%)             | 1.08      | 0.94,1.23     | 0.27     |
| Beta blocker                         | 2,213 (27%)           | 769 (35%)             | 1.47      | 1.33,1.63     | <0.001   |
| Calcium channel blocker              | 1,889 (23%)           | 620 (28%)             | 1.33      | 1.19,1.48     | <0.001   |
| Diuretic                             | 1,483 (18%)           | 492 (22%)             | 1.32      | 1.17,1.48     | <0.001   |
| Other antihypertensive               | 509 (6%)              | 172 (8%)              | 1.30      | 1.08,1.55     | 0.006    |
| Antiplatelet agent                   | 2,290 (27%)           | 820 (37%)             | 1.55      | 1.41,1.72     | <0.001   |
| Anticoagulant                        | 888 (11%)             | 369 (17%)             | 1.68      | 1.47,1.92     | <0.001   |
| <b>Comorbidities‡</b>                |                       |                       |           |               |          |
| Cardiovascular disease               | 2,339 (28%)           | 1,021 (46%)           | 2.20      | 1.99,2.42     | <0.001   |
| Hypertension                         | 5,283 (63%)           | 1,693 (77%)           | 1.88      | 1.69,2.10     | <0.001   |
| Diabetes                             | 3,254 (39%)           | 973 (44%)             | 1.22      | 1.11,1.35     | <0.001   |
| Cancer                               | 936 (11%)             | 339 (15%)             | 1.43      | 1.25,1.64     | <0.001   |
| Chronic kidney disease               | 1,096 (13%)           | 500 (23%)             | 1.93      | 1.71,2.17     | <0.001   |
| Dyslipidemia                         | 3,193 (38%)           | 1,010 (46%)           | 1.35      | 1.23,1.49     | <0.001   |
| Obesity (BMI >30 kg/m <sup>2</sup> ) | 3,613 (43%)           | 719 (33%)             | 0.63      | 0.57,0.69     | <0.001   |
| Smoking or vaping                    | 555 (7%)              | 166 (8%)              | 1.14      | 0.94,1.36     | 0.1694   |
| Immune disorder                      | 397 (5%)              | 107 (5%)              | 1.02      | 0.81,1.27     | 0.9107   |
| Pulmonary disease                    | 1,474 (18%)           | 453 (20%)             | 1.20      | 1.06,1.35     | 0.003    |
| Other comorbidities                  | 22 (0%)               | 4 (0%)                | 0.68      | 0.17,2.02     | 0.6323   |
| <b>Outcomes</b>                      |                       |                       |           |               |          |
| Intensive care unit                  | 1,916 (23%)           | 1,238 (56%)           | 4.25      | 3.85,4.70     | <0.001   |
| Mechanical ventilation               | 944 (11%)             | 1,098 (50%)           | 7.71      | 6.91,8.60     | <0.001   |

\*Change in odds per 10-year increment in age

†OR for death/discharge to hospice compared to absence of the indicated medication or comorbidity

ACE = angiotensin-converting enzyme; ARB = angiotensinogen II receptor blocker; BMI = body mass index; CI = confidence interval; OR = odds ratio for death.
