# Supplementary material for: Relation of prior statin and anti-hypertensive use to severity of disease among patients hospitalized with COVID-19: Findings from the American Heart Association’s COVID-19 Cardiovascular Disease Registry
Source: PubMed Central journal article supplement (PMC8281996; doi:10.1371/journal.pone.0254635), 2021-07-15
Supplement: pone.0254635.s003.pdf [file pone.0254635.s003.pdf]

**S2 Table. Characteristics of patients with severe versus non-severe COVID-19**

|                                      | <b>Non-Severe (n=6380)</b> | <b>Severe (n=4161)</b> | <b>OR</b> | <b>95% CI</b> | <b>p</b> |
|--------------------------------------|----------------------------|------------------------|-----------|---------------|----------|
| <b>Male</b>                          | 3,392 (53%)                | 2,423 (58%)            | 1.23      | 1.13,1.33     | <0.001   |
| <b>Age (years)*</b>                  | 64.1 ± 13.9                | 69.4 ± 13.9            | 1.32      | 1.28,1.35     | <0.001   |
| <b>Insurance status</b>              |                            |                        |           |               |          |
| Medicare (over age 65)               | 2,949 (46%)                | 2,613 (63%)            | 2.04      | 1.83,2.27     | <0.001   |
| Public                               | 1,363 (21%)                | 701 (17%)              | 1.18      | 1.04,1.35     | 0.01     |
| No insurance/unknown                 | 550 (9%)                   | 187 (4%)               | 0.78      | 0.64,0.95     | 0.01     |
| Private                              | 1,518 (24%)                | 660 (16%)              | REF       | REF           | REF      |
| <b>Race</b>                          |                            |                        |           |               |          |
| Hispanic                             | 1,826 (29%)                | 948 (23%)              | 0.64      | 0.58,0.71     | <0.001   |
| Black                                | 1,713 (27%)                | 1,045 (25%)            | 0.75      | 0.68,0.83     | <0.001   |
| Other                                | 770 (12%)                  | 482 (12%)              | 0.77      | 0.67,0.88     | <0.001   |
| Non-Hispanic White                   | 2,071 (32%)                | 1,686 (41%)            | REF       | REF           | REF      |
| <b>Medication history†</b>           |                            |                        |           |               |          |
| Statin                               | 2,609 (41%)                | 1,840 (44%)            | 1.15      | 1.06,1.24     | <0.001   |
| ACE inhibitor                        | 1,098 (17%)                | 733 (18%)              | 1.03      | 0.93,1.14     | 0.60     |
| ARB                                  | 880 (14%)                  | 596 (14%)              | 1.04      | 0.93,1.17     | 0.45     |
| Beta blocker                         | 1,683 (26%)                | 1,299 (31%)            | 1.27      | 1.16,1.38     | <0.001   |
| Calcium channel blocker              | 1,390 (22%)                | 1,119 (27%)            | 1.32      | 1.2,1.45      | <0.001   |
| Diuretic                             | 1,130 (18%)                | 845 (20%)              | 1.18      | 1.07,1.31     | <0.001   |
| Other antihypertensive               | 392 (6%)                   | 289 (7%)               | 1.14      | 0.97,1.34     | 0.11     |
| Antiplatelet agent                   | 1,745 (27%)                | 1,365 (33%)            | 1.30      | 1.19,1.41     | <0.001   |
| Anticoagulant                        | 678 (11%)                  | 579 (14%)              | 1.36      | 1.21,1.53     | <0.001   |
| <b>Comorbidities†</b>                |                            |                        |           |               |          |
| Cardiovascular disease               | 1,775 (28%)                | 1,585 (38%)            | 1.60      | 1.47,1.74     | <0.001   |
| Hypertension                         | 3,983 (62%)                | 2,993 (72%)            | 1.54      | 1.42,1.68     | <0.001   |
| Diabetes                             | 2,446 (38%)                | 1,781 (43%)            | 1.20      | 1.11,1.3      | <0.001   |
| Cancer                               | 734 (12%)                  | 541 (13%)              | 1.15      | 1.02,1.3      | 0.02     |
| Chronic kidney disease               | 829 (13%)                  | 767 (18%)              | 1.51      | 1.36,1.69     | <0.001   |
| Dyslipidemia                         | 2,409 (38%)                | 1,794 (43%)            | 1.25      | 1.15,1.35     | <0.001   |
| Obesity (BMI >30 kg/m <sup>2</sup> ) | 2,675 (42%)                | 1,657 (40%)            | 0.92      | 0.85,0.99     | 0.03     |
| Smoking or vaping                    | 424 (7%)                   | 297 (7%)               | 1.08      | 0.92,1.26     | 0.34     |
| Immune disorder                      | 310 (5%)                   | 194 (5%)               | 0.96      | 0.79,1.15     | 0.67     |
| Pulmonary disease                    | 1,077 (17%)                | 850 (20%)              | 1.26      | 1.14,1.4      | <0.001   |
| Other comorbidities                  | 15 (0%)                    | 11 (0%)                | 1.12      | 0.47,2.62     | 0.84     |
| <b>Outcomes</b>                      |                            |                        |           |               |          |
| Intensive care unit                  | 0 (0%)                     | 3,154 (76%)            |           |               |          |
| Mechanical ventilation               | 0 (0%)                     | 2,042 (49%)            |           |               |          |
| Death or hospice                     | 0 (0%)                     | 2,212 (53%)            |           |               |          |

\*Change in odds per 10-year increment in age

†OR for severe outcome (death/discharge to hospice, mechanical ventilation, intensive care unit) compared to absence of the indicated medication or comorbidity

Severe disease includes need for intensive care unit or mechanical ventilation, or death.

ACE = angiotensin-converting enzyme; ARB = angiotensinogen II receptor blocker, BMI = body mass index;  
CI = confidence interval; OR = odds ratio for severe disease.
